# Supplementary material for: The Comparative Effects of Different Types of Oral Vitamin Supplements on Arterial Stiffness: A Network Meta-Analysis
Source: MDPI journal article supplement (doi:10.3390/nu14051009), 2022-02-27

**Table S1.** Search strategy for the MEDLINE database.

|                                                                                                                               |     |                                                                                                                                                                                                                                                                                                             |     |                                                                                        |
|-------------------------------------------------------------------------------------------------------------------------------|-----|-------------------------------------------------------------------------------------------------------------------------------------------------------------------------------------------------------------------------------------------------------------------------------------------------------------|-----|----------------------------------------------------------------------------------------|
| Adults<br>OR<br>Young adults<br>OR<br>Older adults<br>OR<br>Elderly adults<br>OR<br>Adult population<br>OR<br>Adults subjects | AND | Vitamins<br>OR<br>Oral vitamins<br>supplementation<br>OR<br>Vitamin B9<br>OR<br>Folic acid<br>OR<br>Vitamin C<br>OR<br>Ascorbic acid<br>OR<br>Vitamin D<br>OR<br>Calciferol<br>OR<br>Vitamin D3<br>OR<br>Cholecalciferol<br>OR<br>Vitamin D2<br>OR<br>Ergocalciferol<br>OR<br>Vitamin E<br>OR<br>Tocopherol | AND | Arterial stiffness<br>OR<br>Aortic stiffness<br>OR<br>Pulse wave velocity<br>OR<br>PWv |
|-------------------------------------------------------------------------------------------------------------------------------|-----|-------------------------------------------------------------------------------------------------------------------------------------------------------------------------------------------------------------------------------------------------------------------------------------------------------------|-----|----------------------------------------------------------------------------------------|

**Table S2.** Quality grading of evidence.

| № of studies              | Study design      | Risk of bias         | Certainty assessment |                      |             |                      | № of patients            |                                  | Effect            |                                                       | Certainty     | Importance    |
|---------------------------|-------------------|----------------------|----------------------|----------------------|-------------|----------------------|--------------------------|----------------------------------|-------------------|-------------------------------------------------------|---------------|---------------|
|                           |                   |                      | Inconsistency        | Indirectness         | Imprecision | Other considerations | Oral vitamin supplements | placebo/oral vitamin supplements | Relative (95% CI) | Absolute (95% CI)                                     |               |               |
| Vitamin B9 versus Placebo |                   |                      |                      |                      |             |                      |                          |                                  |                   |                                                       |               |               |
| 2                         | randomised trials | serious <sup>a</sup> | not serious          | not serious          | not serious | none                 | 25                       | 25                               | -                 | SMD <b>0.14 SD lower</b> (0.69 lower to 0.42 higher)  | ⊕⊕⊕○ Moderate | NOT IMPORTANT |
| Vitamin C versus Placebo  |                   |                      |                      |                      |             |                      |                          |                                  |                   |                                                       |               |               |
| 2                         | randomised trials | serious <sup>a</sup> | not serious          | serious <sup>b</sup> | not serious | none                 | 42                       | 33                               | -                 | SMD <b>0.17 SD higher</b> (0.29 lower to 0.63 higher) | ⊕⊕○○ Low      | NOT IMPORTANT |
| Vitamin D versus Placebo  |                   |                      |                      |                      |             |                      |                          |                                  |                   |                                                       |               |               |
| 1                         | randomised trials | serious <sup>a</sup> | not serious          | not serious          | not serious | none                 | 39                       | 40                               | -                 | SMD <b>0.04 SD lower</b> (0.56 lower to 0.47 higher)  | ⊕⊕⊕○ Moderate | NOT IMPORTANT |
| Vitamin D2 versus Placebo |                   |                      |                      |                      |             |                      |                          |                                  |                   |                                                       |               |               |
| 2                         | randomised trials | serious <sup>a</sup> | not serious          | not serious          | not serious | none                 | 132                      | 132                              | -                 | SMD <b>0.24 SD lower</b> (0.5 lower to 0.01 higher)   | ⊕⊕⊕○ Moderate | NOT IMPORTANT |
| Vitamin D3 versus Placebo |                   |                      |                      |                      |             |                      |                          |                                  |                   |                                                       |               |               |

|                              |                   |                      |             |             |             |      |      |      |   |                                                      |               |               |
|------------------------------|-------------------|----------------------|-------------|-------------|-------------|------|------|------|---|------------------------------------------------------|---------------|---------------|
| <b>15</b>                    | randomised trials | serious <sup>a</sup> | not serious | not serious | not serious | none | 1036 | 1037 | - | SMD <b>0.08 SD lower</b> (0.24 lower to 0.08 higher) | ⊕⊕⊕○ Moderate | CRITICAL      |
| Vitamin E versus Placebo     |                   |                      |             |             |             |      |      |      |   |                                                      |               |               |
| <b>2</b>                     | randomised trials | serious <sup>c</sup> | not serious | serious     | not serious | none | 55   | 38   | - | SMD <b>0.2 SD higher</b> (0.17 lower to 0.58 higher) | ⊕⊕○○ Low      | NOT IMPORTANT |
| Vitamin D3 versus vitamin D  |                   |                      |             |             |             |      |      |      |   |                                                      |               |               |
| <b>1</b>                     | randomised trials | serious <sup>a</sup> | not serious | not serious | not serious | none | 40   | 39   | - | SMD <b>0.32 SD lower</b> (0.84 lower to 0.2 higher)  | ⊕⊕⊕○ Moderate | NOT IMPORTANT |
| Vitamin D3 versus vitamin D2 |                   |                      |             |             |             |      |      |      |   |                                                      |               |               |
| <b>2</b>                     | randomised trials | serious <sup>a</sup> | not serious | not serious | not serious | none | 154  | 152  | - | SMD <b>0.25 SD lower</b> (0.48 lower to 0.02 lower)  | ⊕⊕⊕○ Moderate | NOT IMPORTANT |

a. Mainly some concerns based on RoB2

b. The direction of effect in controversy

c. 50% high risk of bias based on RoB2

**CI:** confidence interval; **SMD:** standardised mean difference

**Table S3.** Effectiveness ranking of different types of oral vitamin supplements on arterial stiffness.

|                   | Rank statistics |        |         | Probabilities |       |
|-------------------|-----------------|--------|---------|---------------|-------|
|                   | Mean            | Median | 95% CIs | Best          | SUCRA |
| <b>Placebo</b>    | 4.0             | 5.0    | 1.0-7.0 | 0.01          | 0.50  |
| <b>Vitamin B9</b> | 3.3             | 4.0    | 1.0-5.0 | 0.31          | 0.61  |
| <b>Vitamin C</b>  | 5.5             | 6.0    | 1.0-7.0 | 0.05          | 0.24  |
| <b>Vitamin D</b>  | 3.9             | 4.0    | 2.0-4.0 | 0.14          | 0.52  |
| <b>Vitamin D2</b> | 3.4             | 3.0    | 2.0-5.0 | 0.20          | 0.60  |
| <b>Vitamin D3</b> | 2.3             | 4.0    | 1.0-7.0 | 0.26          | 0.78  |
| <b>Vitamin E</b>  | 5.5             | 6.0    | 1.0-7.0 | 0.03          | 0.25  |

**Table S4.** Heterogeneity statistics for each comparison.

|                                 | <b>Q (df)</b> | <b>I<sup>2</sup></b> | <b>τ<sup>2</sup></b> | <b>p</b> |
|---------------------------------|---------------|----------------------|----------------------|----------|
| <b>Vitamin B9 vs Placebo</b>    | 0.09 (1)      | 0.00 %               | 0.00                 | 0.76     |
| <b>Vitamin C vs Placebo</b>     | 0.09 (1)      | 0.00%                | 0.00                 | 0.76     |
| <b>Vitamin D vs Placebo</b>     | 0.00 (0)      | -                    | 0.00                 | -        |
| <b>Vitamin D2 vs Placebo</b>    | 0.28 (1)      | 0.00 %               | 0.00                 | 0.60     |
| <b>Vitamin D3 vs Placebo</b>    | 40.94 (15)    | 63.40%               | 0.06                 | 0.00     |
| <b>Vitamin E vs Placebo</b>     | 2.03 (3)      | 0.00%                | 0.00                 | 0.57     |
| <b>Vitamin D3 vs Vitamin D</b>  | 0.00 (0)      | -                    | 0.00                 | -        |
| <b>Vitamin D3 vs Vitamin D2</b> | 0.56 (1)      | 0.00%                | 0.00                 | 0.46     |

**Table S5.** Subgroup analysis according to mean age (<65 years or >65 years) by type of vitamin on arterial stiffness.

|                                 | Adults <65 years |                             |                |                  | Older Adults >65 years |                     |                |                  |
|---------------------------------|------------------|-----------------------------|----------------|------------------|------------------------|---------------------|----------------|------------------|
|                                 | n<br>(samples)   | ES<br>(95% CIs)             | I <sup>2</sup> | %Change<br>(m/s) | n<br>(samples)         | ES<br>(95% CIs)     | I <sup>2</sup> | %Change<br>(m/s) |
| <b>Vitamin B9 vs Placebo</b>    | 2 (2)            | -0.14 (-0.69, 0.42)         | 0.00%          | -26.0%           | -                      | -                   | -              | -                |
| <b>Vitamin C vs Placebo</b>     | 2 (2)            | 0.17 (-0.29, 0.63)          | 0.00%          | 48.0%            | -                      | -                   | -              | -                |
| <b>Vitamin D vs Placebo</b>     | -                | -                           | -              | -                | 1 (1)                  | -0.04 (-0.56, 0.47) | -              | -                |
| <b>Vitamin D2 vs Placebo</b>    | 2 (2)            | -0.24 (-0.50, 0.01)         | 0.00%          | -44.0%           | -                      | -                   | -              | -                |
| <b>Vitamin D3 vs Placebo</b>    | 5 (5)            | -0.26 (-0.61, 0.09)         | 66.10%         | -71.0%           | 8 (11)                 | -0.01 (-0.15, 0.13) | 40.80%         | -15.0%           |
| <b>Vitamin E vs Placebo</b>     | 1 (3)            | -0.04 (-0.57, 0.50)         | 0.00%          | -3.0%            | 1 (1)                  | 0.43 (-0.10, 0.96)  | -              | -                |
| <b>Vitamin D3 vs Vitamin D</b>  | -                | -                           | -              | -                | 1 (1)                  | -0.32 (-0.84, 0.20) | -              | -                |
| <b>Vitamin D3 vs Vitamin D2</b> | 1 (1)            | <b>-0.30 (-0.57, -0.03)</b> | -              | -                | 1 (1)                  | -0.10 (-0.55, 0.35) | -              | -                |

**Table S6.** Subgroup analysis according to length of intervention by type of vitamin on arterial stiffness.

|                                 | Intervention <12 weeks |                     |                |               | Intervention >12 weeks |                             |                |               |
|---------------------------------|------------------------|---------------------|----------------|---------------|------------------------|-----------------------------|----------------|---------------|
|                                 | n (samples)            | ES (95%CI)          | I <sup>2</sup> | %Change (m/s) | n (samples)            | ES (95%CI)                  | I <sup>2</sup> | %Change (m/s) |
| <b>Vitamin B9 vs Placebo</b>    | 2 (2)                  | -0.14 (-0.69, 0.42) | 0.00%          | -25.0%        | -                      | -                           | -              | -             |
| <b>Vitamin C vs Placebo</b>     | 2 (2)                  | 0.17 (-0.29, 0.63)  | 0.00%          | 48.0%         | -                      | -                           | -              | -             |
| <b>Vitamin D vs Placebo</b>     | -                      | -                   | -              | -             | 1 (1)                  | -0.04 (-0.55, 0.47)         | -              | -             |
| <b>Vitamin D2 vs Placebo</b>    | -                      | -                   | -              | -             | 2 (2)                  | -0.24 (-0.50, 0.01)         | 0.00%          | -45.0%        |
| <b>Vitamin D3 vs Placebo</b>    | 3 (3)                  | 0.34 (-0.30, 0.98)  | 80.60%         | 11.0%         | 11 (13)                | <b>-0.15 (-0.30, -0.00)</b> | 53.10%         | -60.0%        |
| <b>Vitamin E vs Placebo</b>     | 2 (4)                  | 0.20 (-0.17, 0.58)  | 0.00%          | -3.0%         | -                      | -                           | -              | -             |
| <b>Vitamin D3 vs Vitamin D</b>  | -                      | -                   | -              | -             | 1 (1)                  | -0.32 (-0.84, 0.20)         | -              | -             |
| <b>Vitamin D3 vs Vitamin D2</b> | -                      | -                   | -              | -             | 2 (2)                  | <b>-0.25 (-0.48, -0.02)</b> | 0.00%          | -52.0%        |

**Table S7.** Subgroup analysis according to type of pulse wave velocity by type of vitamin.

|                              | Central PWv |                     |                |               | Peripheral PWv |                    |                |               |
|------------------------------|-------------|---------------------|----------------|---------------|----------------|--------------------|----------------|---------------|
|                              | n (samples) | ES (95%CI)          | I <sup>2</sup> | %Change (m/s) | n (samples)    | ES (95%CI)         | I <sup>2</sup> | %Change (m/s) |
| <b>Vitamin B9 vs Placebo</b> | 2 (2)       | -0.14 (-0.69, 0.42) | 0.00%          | -25.0%        | -              | -                  | -              | -             |
| <b>Vitamin C vs Placebo</b>  | -           | -                   | -              | -             | 2 (2)          | 0.17 (-0.29, 0.63) | 0.00%          | 48.0%         |
| <b>Vitamin D vs Placebo</b>  | 1 (1)       | -0.04 (-0.56, 0.47) | -              | -             | -              | -                  | -              | -             |

|                                 |         |                             |        |        |       |                    |   |   |
|---------------------------------|---------|-----------------------------|--------|--------|-------|--------------------|---|---|
| <b>Vitamin D2 vs Placebo</b>    | 2 (2)   | -0.24 (-0.50, 0.01)         | 0.00%  | -43.0% | -     | -                  | - | - |
| <b>Vitamin D3 vs Placebo</b>    | 13 (15) | -0.10 (-0.26, 0.07)         | 64.40% | -85.0% | 1 (1) | 0.25 (-0.31, 0.81) | - | - |
| <b>Vitamin E vs Placebo</b>     | 2 (4)   | 0.20 (-0.17, 0.58)          | 0.00%  | 55.0%  | -     | -                  | - | - |
| <b>Vitamin D3 vs Vitamin D</b>  | 1 (1)   | -0.32 (-0.84, 0.20)         | -      | -      | -     | -                  | - | - |
| <b>Vitamin D3 vs Vitamin D2</b> | 2 (2)   | <b>-0.25 (-0.48, -0.02)</b> | 0.00%  | -36.0% | -     | -                  | - | - |

**Table S8.** Subgroup analysis according to type of vitamin (water-soluble or fat-soluble) on arterial stiffness.

| <b>Water-soluble vitamins</b> |                    |                      |                      | <b>Fat-soluble vitamins</b> |                     |                      |                      |
|-------------------------------|--------------------|----------------------|----------------------|-----------------------------|---------------------|----------------------|----------------------|
| <b>n (samples)</b>            | <b>ES (95%CI)</b>  | <b>I<sup>2</sup></b> | <b>%Change (m/s)</b> | <b>n (samples)</b>          | <b>ES (95%CI)</b>   | <b>I<sup>2</sup></b> | <b>%Change (m/s)</b> |
| 4 (4)                         | 0.04 (-0.31, 0.40) | 0.00%                | 17.0%                | 17 (22)                     | -0.09 (-0.21, 0.02) | 47.20%               | -73.0%               |

**Table S9.** Meta-regression according to mean age and length of intervention for vitamin D3 vs Placebo on arterial stiffness.

| Vitamin D3 vs Placebo | Coefficient | 95%ICs      | P value |
|-----------------------|-------------|-------------|---------|
| Mean age              | 0.01        | -0.01, 0.03 | 0.235   |
| Length                | -0.01       | -0.03, 0.02 | 0.622   |



**Figure S1.** Quality assessment using the Cochrane Collaboration’s tool for assessing risk of bias in randomized clinical trials (RoB2) for each study.

| Reference                | D1 | D2 | D3 | D4 | D5 | Overall |                                               |
|--------------------------|----|----|----|----|----|---------|-----------------------------------------------|
| Mangoni et al, 2002      | +  | !  | +  | +  | +  | !       | +                                             |
| Mangoni et al, 2005      | +  | !  | +  | +  | +  | !       | !                                             |
| Nightingale et al, 2003  | !  | !  | !  | !  | +  | !       | -                                             |
| Nightingale et al, 2007  | !  | !  | +  | !  | +  | !       |                                               |
| Dreyer et al, 2014       | +  | +  | !  | !  | +  | !       | D1 Randomisation process                      |
| Kovesdy et al, 2012      | +  | !  | +  | !  | +  | !       | D2 Deviations from the intended interventions |
| Forouhi et al, 2016      | +  | !  | +  | +  | +  | !       | D3 Missing outcome data                       |
| Larsen et al, 2012       | +  | +  | !  | +  | +  | !       | D4 Measurement of the outcome                 |
| Marckmann et al, 2012    | +  | +  | +  | +  | +  | +       | D5 Selection of the reported result           |
| Hewitt et al, 2013       | +  | +  | +  | !  | +  | !       |                                               |
| Witham et al, 2013       | +  | +  | +  | +  | +  | +       |                                               |
| Mose et al, 2014         | +  | +  | !  | +  | +  | !       |                                               |
| Pilz et al, 2015         | +  | !  | +  | +  | +  | !       |                                               |
| Witham et al, 2015       | +  | +  | !  | +  | +  | !       |                                               |
| Bressendorff et al, 2016 | +  | +  | !  | !  | +  | !       |                                               |
| Kumar et al, 2017        | +  | +  | +  | +  | +  | +       |                                               |
| Sluyter et al, 2017      | +  | !  | !  | +  | +  | !       |                                               |
| Gepner et al, 2012       | +  | !  | +  | +  | +  | !       |                                               |
| Levin et al, 2017        | +  | !  | !  | !  | +  | !       |                                               |
| Tomson et al, 2017       | +  | +  | +  | +  | +  | +       |                                               |
| Rasool et al, 2006       | !  | !  | +  | !  | +  | !       |                                               |
| Stonehouse et al, 2016   | +  | +  | +  | +  | +  | +       |                                               |

**Figure S2.** Overall quality assessment using the Cochrane Collaboration’s tool for assessing risk of bias in randomized clinical trials (RoB2).

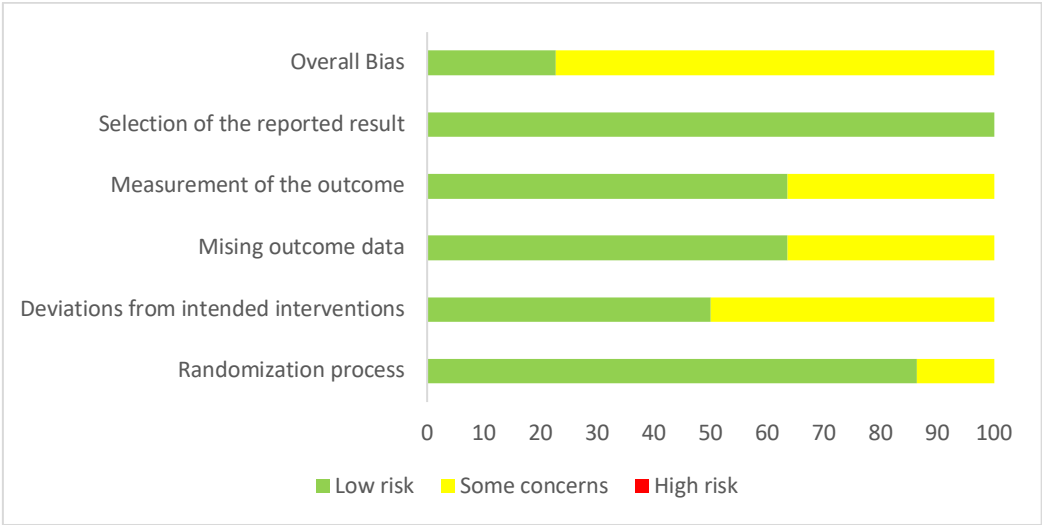

**Figure S3.** Rankogram for each of different types of oral vitamin supplements on arterial stiffness.

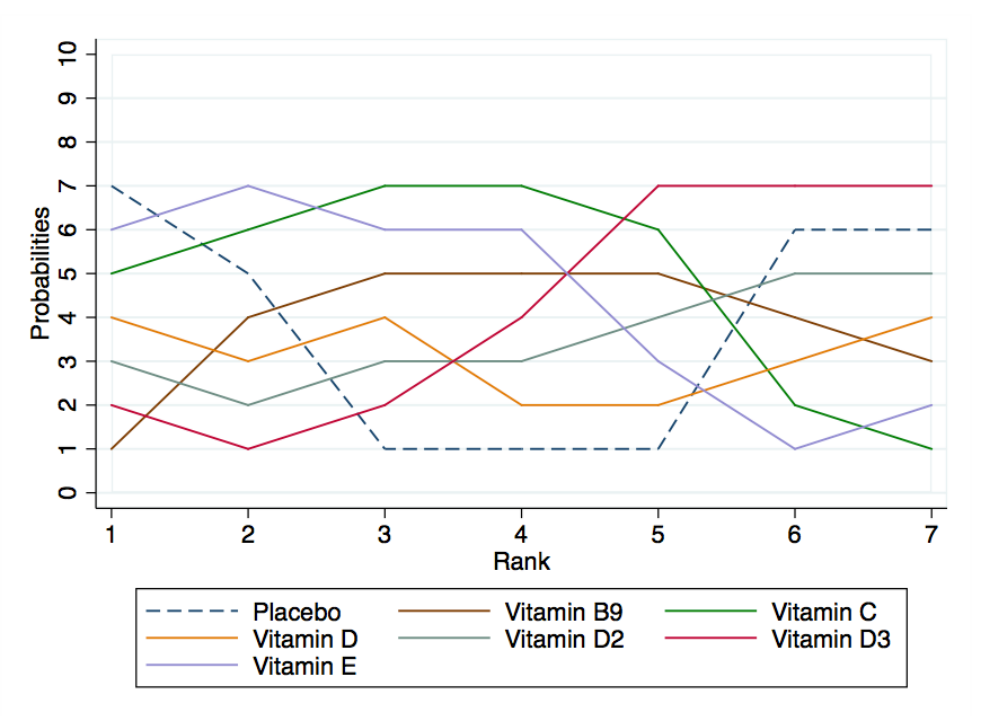

**Figure S4.** Funnel plot for comparison-specific pooled mean differences.

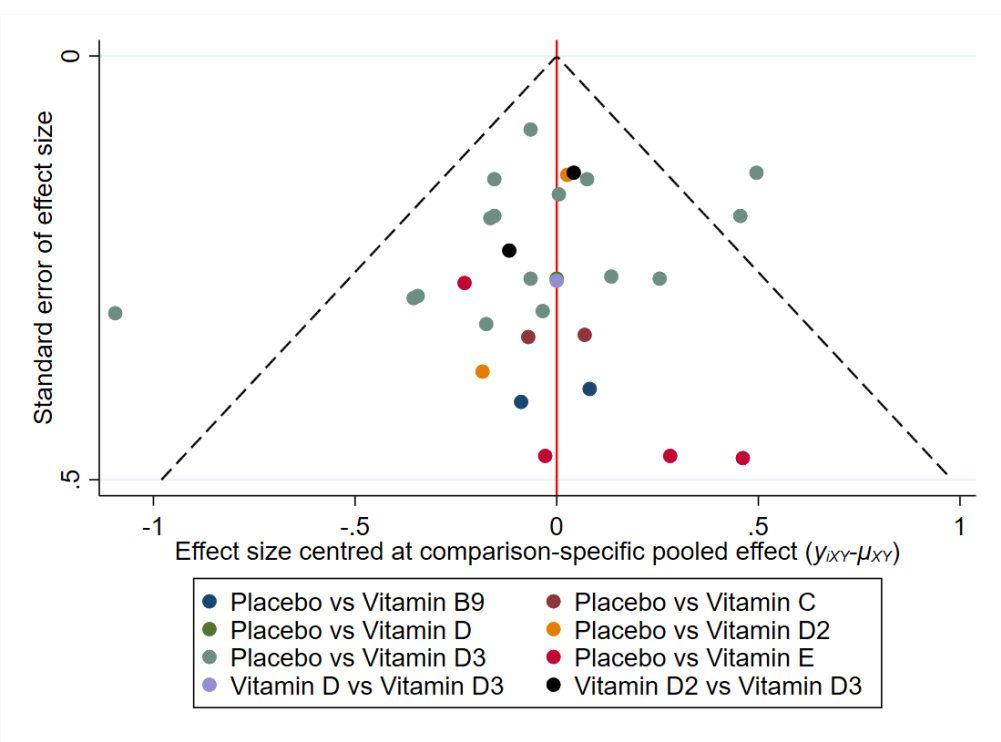

Supplement: s1 [file s1]
